# Supplementary material for: Surfactant-free hydrothermal synthesis of lithium aluminate microbricks and nanorods from aluminium oxide nanoparticles
Source: Royal Society of Chemistry journal article supplement (doi:10.1039/b508168h), 2005-01-01
Supplement: b508168h.pdf [file b508168h.pdf]

## Surfactant-free hydrothermal synthesis of lithium aluminate microbricks and nanorods from aluminum oxide nanoparticles

Upendra A Joshi, Jae Sung Lee\*

*Department of Chemical Engineering and School of Environmental Science and Engineering, Pohang University of Science and Technology (POSTECH), San 31 Hyoja-dong, Pohang 790-784, Korea*

*E-mail: [jlee@postech.ac.kr](mailto:jlee@postech.ac.kr)*

### Detailed Experimental Procedure

In the typical synthesis of lithium aluminate microbricks (LiAlO<sub>2</sub>-MB), 0.03 mol of LiOH (0.71 g, Aldrich) and 0.0098 mol Al<sub>2</sub>O<sub>3</sub> nanopowder (1 g, Aldrich) were stirred together with 36 mL distilled water for 1 hr (Li/Al = 3). Then the mixture was transferred to a Teflon-coated reactor (100 mL), and was put into hydrothermal reaction at a constant temperature (150 °C) without disturbing for 3 days. For the synthesis of lithium aluminate rectangular nanorods (LiAlO<sub>2</sub>-RNR) similar procedure was employed, except that we used 0.15 mol (3.59 g) of LiOH (Li/Al = 15). The as-obtained white product was separated by centrifugation, washed with distilled water to remove the excess of LiOH and then dried in an oven at 100 °C for overnight and then calcined at 950 °C for 12 hr in air flow (200 mL/min). The products were characterized by a number of methodologies, including X-ray diffraction (XRD, MAC Science, M18XHF diffractometer with Cu K $\alpha$  radiation), Scanning electron microscopy (FE-SEM, FEI XL30S), transmission electron microscopy (TEM, Philips CM-20 with an accelerating voltage of 200 kV), field emission high resolution transmission electron microscopy (FE-HREM, Jeol 2100F) selected area diffraction (SAED) pattern.

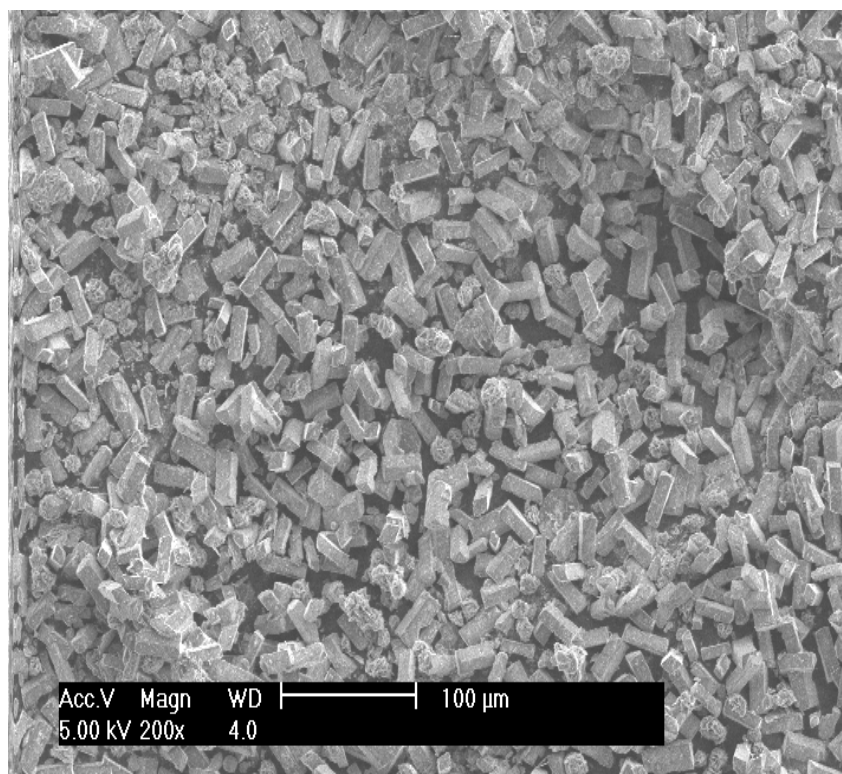

**Figure S1** SEM image shows high uniformity in the morphology of the as-obtained micro-bricks.

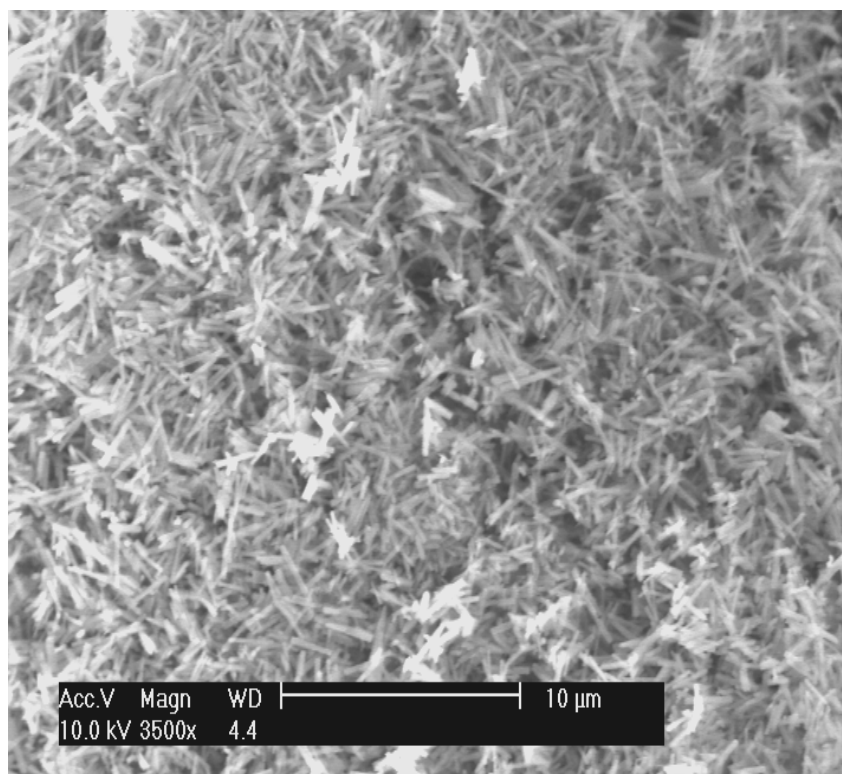

**Figure S2** SEM image shows high uniformity in the morphology of the as-obtained nanorods.

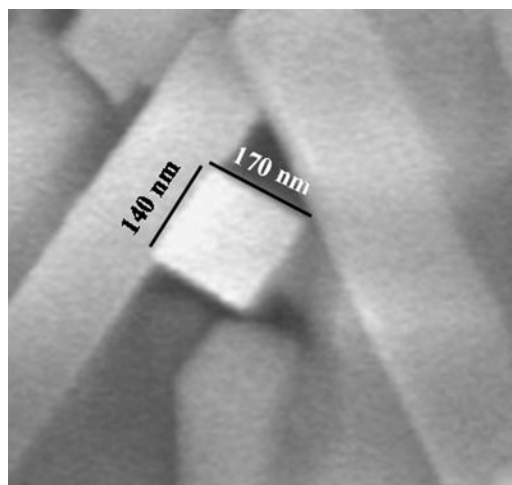

**Figure S3** The high resolution SEM image shows the edges of a nanorod is 140 nm and 170 nm respectively, which clears the orthorhombic structure.

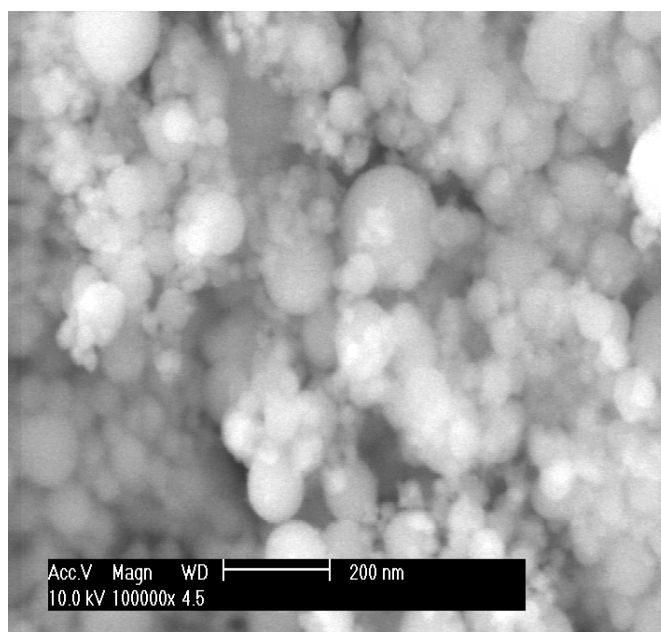

**Figure S4** SEM image of the starting material,  $\text{Al}_2\text{O}_3$  nanoparticles.

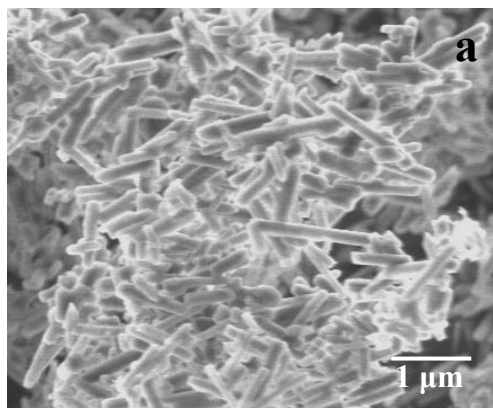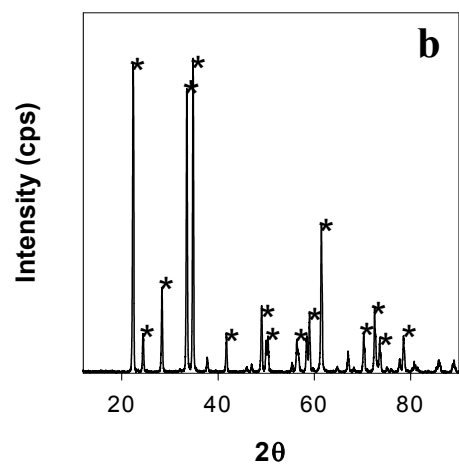

**Figure S5.** a) The SEM image of calcined sample shows the morphology still maintained. b) The XRD pattern of  $\text{LiAlO}_2$  nanorods after heat treatment at  $950\text{ }^\circ\text{C}$  for 12 h. Note that the phase has been changed to  $\gamma\text{-LiAlO}_2$  as indicated by (\*).
